# Supplementary material
Source: PubMed Central journal article supplement (PMC2631141)
Supplement: neo1102_0167SD1.pdf [file neo1102_0167SD1.pdf]

**Table W1.** Cell Lines Used for miRNA Expression Validation.

| Class | Name                   | EBV | Reference         |
|-------|------------------------|-----|-------------------|
| HL    | L428 (cHL)             | -   | [1,2]             |
|       | KM-H2 (cHL)            | -   | [2]               |
|       | HDLM2 (T-cell HL)      | -   | [2]               |
|       | L1236 (cHL)            | -   | [2,3]             |
|       | L591 (cHL)             | +   | [2]               |
|       | DEV (NLPHL)            | -   | [4,5]             |
| PMBL  | MedB-1                 | -   | [6]               |
|       | Karpas 1106P           | -   | [6]               |
| DLBCL | ROSE                   | -   | [2]               |
|       | VER                    | -   | [2]               |
|       | SU-DHL-4               | -   | A. Epstein (UCLA) |
|       | SU-DHL-6               | -   | A. Epstein (UCLA) |
|       | OCI Ly3                | -   | [7]               |
|       | SCHI                   | -   |                   |
| BL    | Raji                   | +   | [8]               |
|       | CA46                   | -   | [8]               |
|       | BL-65                  | +   | [8]               |
|       | Namalwa                | +   | [8]               |
|       | DG-75                  | -   | [8]               |
|       | Jiyoye                 | +   | [8]               |
|       | Ramos (RA 1)           | -   | [8]               |
| LCL   | CB-LCL 6.28            | +   | [9]               |
|       | CB-LCL 5.5-1           | +   | [9]               |
|       | CB-LCL 5.b2            | +   | [9]               |
|       | CB-LCL 6.16            | +   | [9]               |
|       | CB-LCL 5.B8            | +   | [9]               |
|       | 1H2 (EBV transformed)  | +   | [10]              |
| CLL   | 15E6 (EBV transformed) | +   | [10]              |
|       | EHEB (B-CLL)           | +   | DSMZ              |
|       | MEC-1 (B-CLL)          | +   | DSMZ              |
|       | MEC-2 (B-CLL)          | +   | DSMZ              |
|       | JVM-3 (B-CLL)          | +   | DSMZ              |

DSMZ = Deutsche Sammlung von Microorganismen und Zellkulturen, GmbH, located in Braunschweig, Germany.

**Table W2.** Primer Sequences Used for Amplification of Target Sequences.

| Gene          | Forward Primer* (5'-3')          | Reverse Primer <sup>†</sup> (5'-3')          | Size (bp) |
|---------------|----------------------------------|----------------------------------------------|-----------|
| <i>GAB2</i>   | GAGCTC-ATGTCAGATCGCAGGGTAGG      | TCTAGA-AGTCGCTCTCCGAAGATTCC                  | 1205      |
| <i>BACH2</i>  | GAGCTC-GGAAAGACAGCAGTGATGAC      | GCGGCCGC-GTGCAAGTGGCAAAGTTGAC                | 659       |
| <i>ICOSL</i>  | GAGCTC-AGGGCCGTGTTTGGCTACAG      | TCTAGA-CCTCAGGCATGAGGGACAGA                  | 1187      |
| <i>ZIC3</i>   | GAGCTC-TGGTACGTCTGAGGACAAAC      | GCGGCCGC-GAGTCTTCCCAGATGGAAAC                | 979       |
| <i>IKBKE</i>  | GAGCTC-TCCCAGCACCTCCTGATGTC      | GCGGCCGC-CTGCTTCCCAGGGAGAAAGG                | 215       |
| <i>TIP120</i> | TGTTTGGCTTCTTCCAITTG             | AGAAAGAAATTCATGGTCAC                         | 226       |
| <i>AGTR1</i>  | GAGCTC-CATGTTTCGAAACCTGTCCATAAAG | GCGGCCGC-ATAAAATTTATTTTAAAGTAAAT             | 897       |
| <i>ZNF537</i> | GAGCTC-TGTGGAAGGCACCTTCAG        | TCTAGA-CCAGCTCCGTCATAAACAG                   | 1668      |
| <i>FGF7</i>   | ACTACTCGAGCTGATCAAGCTGGACTTGCGC  | ATAAGAATGCGGCCGCTAACAAAACAATAAAATTCAAATACAAC | 790       |
| <i>MNAB</i>   | TTGTGACCACCATGGAAG               | TTACTGCACCGGATGTCTAC                         | 282       |
| <i>MAF</i>    | GAGCTC-AAGCCTGCATCAACCTTCTG      | GCGGCCGC-GGGCAATTTATGGCTCAACTC               | 1795      |

*TIP120*, *MNAB*, and *FGF7* were subcloned first in a TOPO vector and lack specific restriction sites. Size indicates the size of the PCR product that was cloned into the vector.

\*The restriction site for endonucleases *NsiI* was added to the forward primer.

<sup>†</sup>The restriction site for *SstI* or *XbaI* was added to the reverse primer (separated by dash).

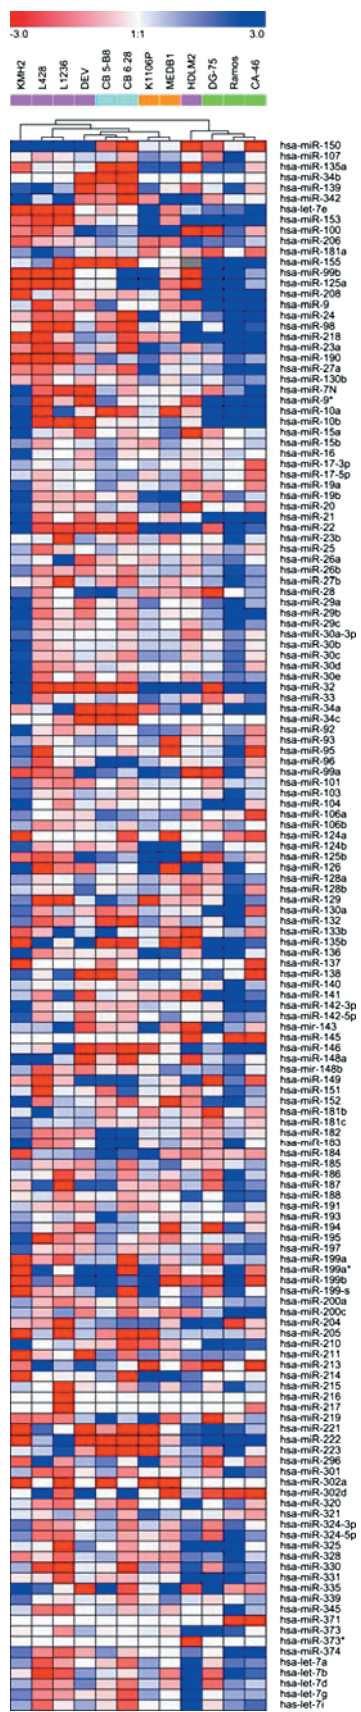

**Figure W1.** Heat chart of miRNA expression in B-cell-derived cell lines.

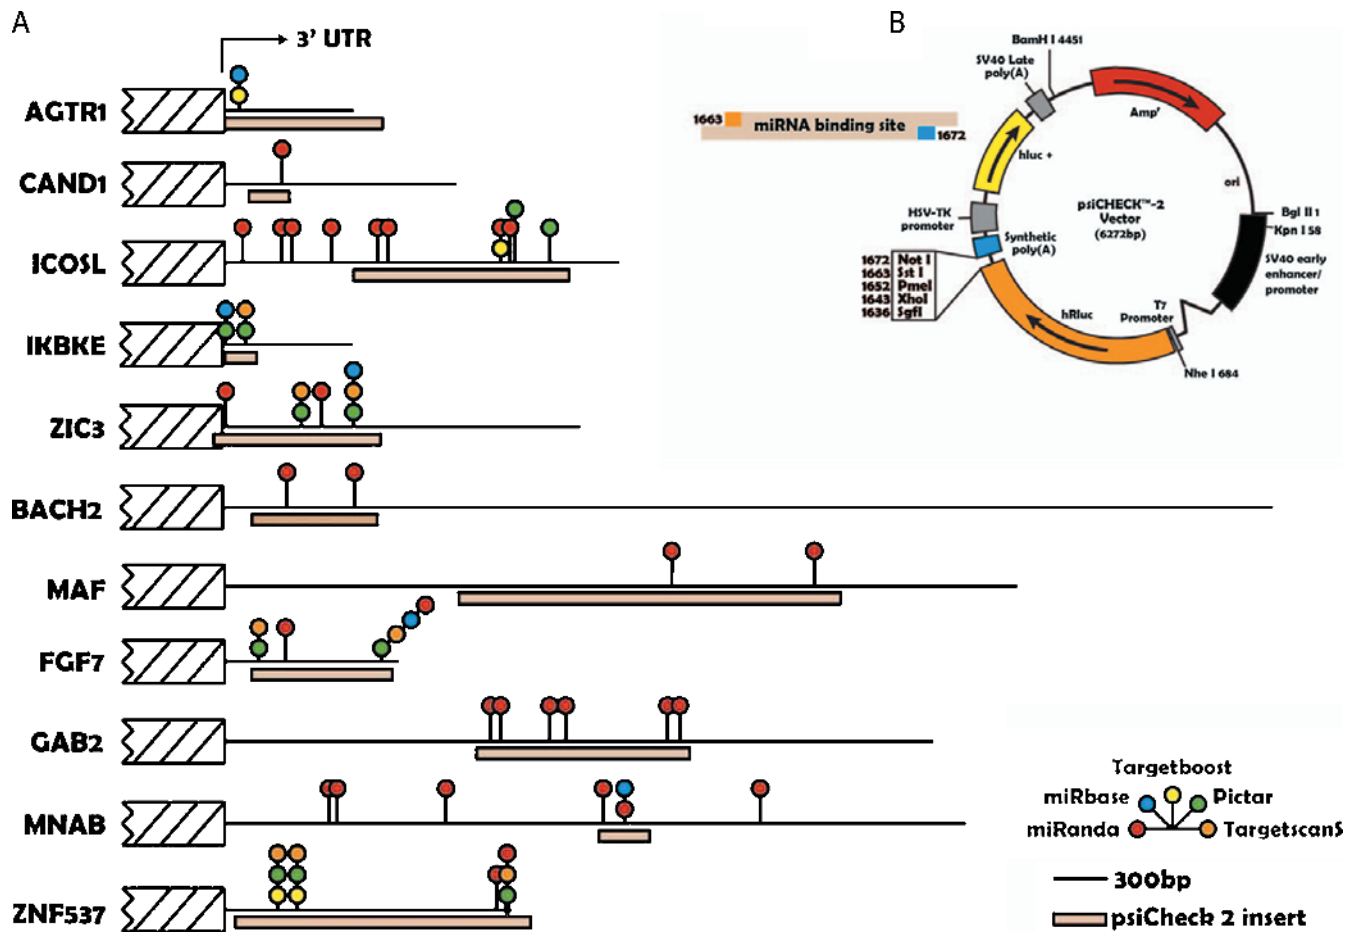

**Figure W2.** Schematic presentation of the predicted target sequences cloned in the psiCHECK2 vector. The regions from the 3' UTR of potential miR-155 targets (A) were cloned into psiCHECK2 vector (B) for target gene validation experiments.

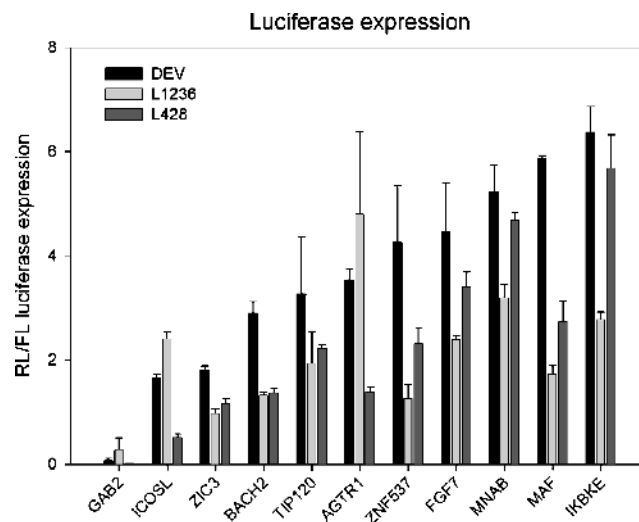

**Figure W3.** The FL/RL luciferase expression ratios observed in the three HL cell lines without miR-155-specific inhibitor. Luciferase ratios obtained for the psiCHECK2 constructs containing 3' UTR sequences of potential miR-155 target genes. Error bars indicate the SD for three replicate experiments.
